# Supplementary material
Source: publisher figshare collection journal article supplement (https://acs.figshare.com/ndownloader/files/14772197)
Supplement: Supplementary file 1 [file 14772197]

## Supplementary information

# Mitochondria and nuclei dual-targeted hollow carbon nanospheres for cancer chemo-photodynamic synergistic therapy

Ruizhi Xie<sup>#1</sup>, Shu Lian<sup>#1</sup>, Huayi Peng<sup>#2</sup>, Changhe OuYang<sup>1</sup>, Shuhui Li<sup>1</sup>, Yusheng Lu<sup>1,3</sup>,  
Xuning Cao<sup>4</sup>, Chen Zhang<sup>3</sup>, Jianhua Xu<sup>2</sup>, Lee Jia<sup>1,3\*</sup>

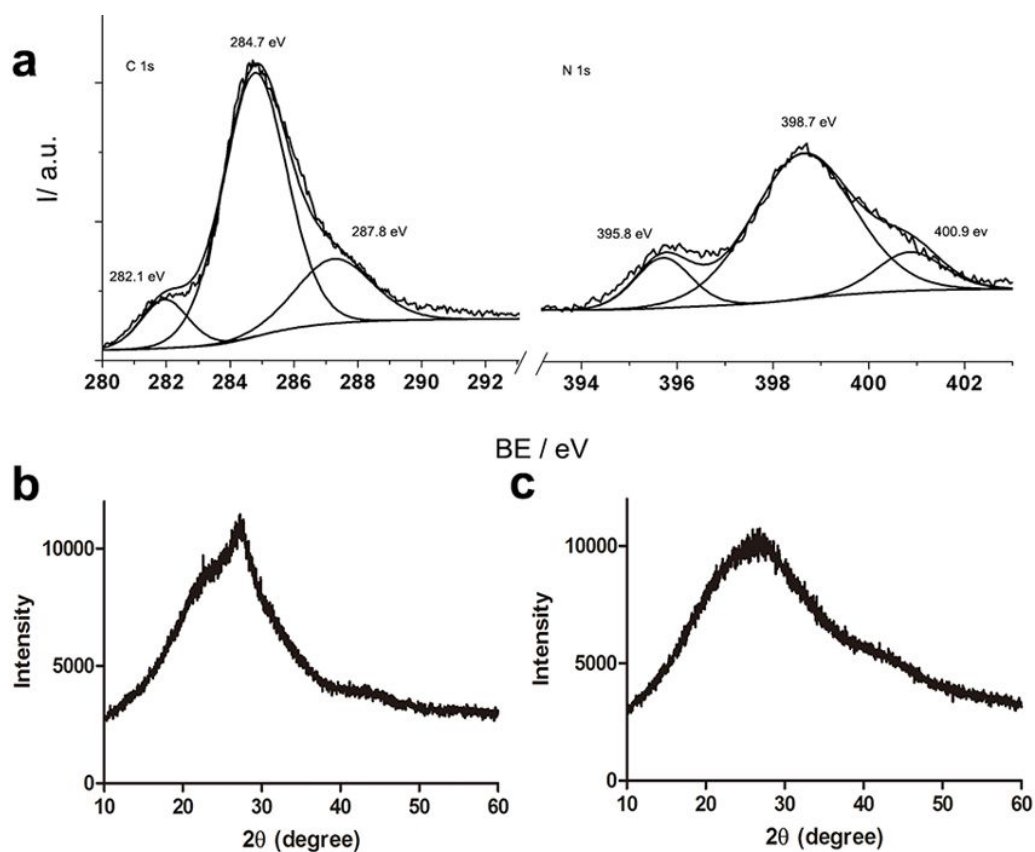

**Figure. S1.** (a) XPS spectra of HCNS. XRD patterns of HCNS (b) and HKH (c). Nanoparticles show only one reflection peak at 27.14 °.

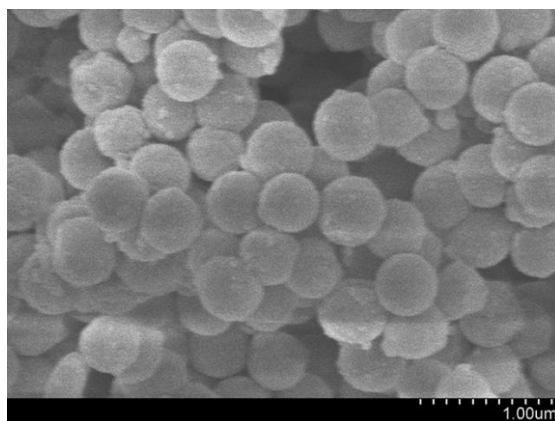

**Figure. S2.** SEM image of HCNS.

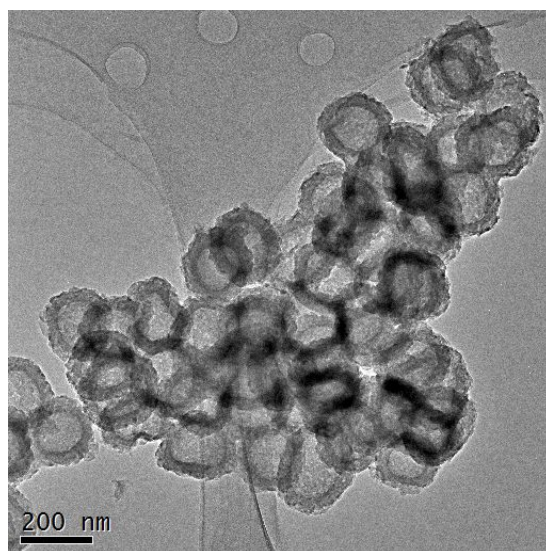

**Figure. S3.** TEM image of HCNS.

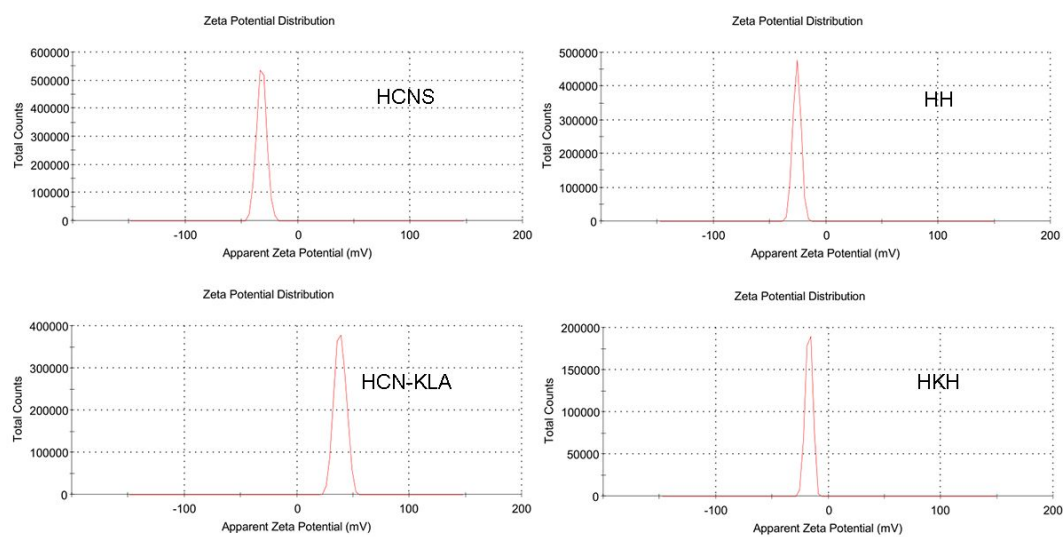

**Figure. S4.** Zeta potential of HCNS, HH, HCN-KLA and HKH.

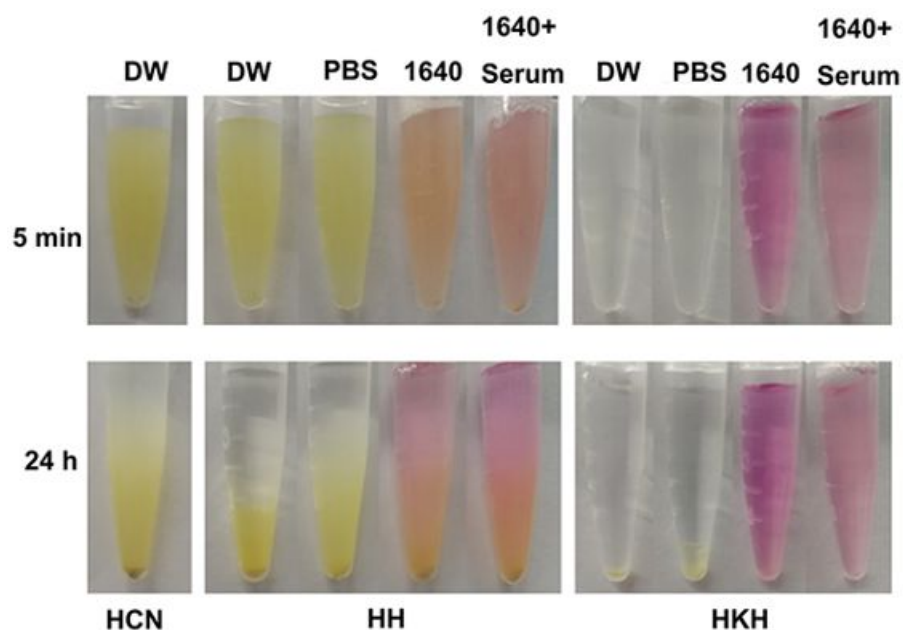

**Figure. S5.** Photos of three types of 2 mg mL<sup>-1</sup> nanoparticles (HCNS, HH and HKH) in deionized water (DW), PBS, RPMI 1640 and cell culture medium (RPMI 1640 +10% serum) before and after 24 h storage.

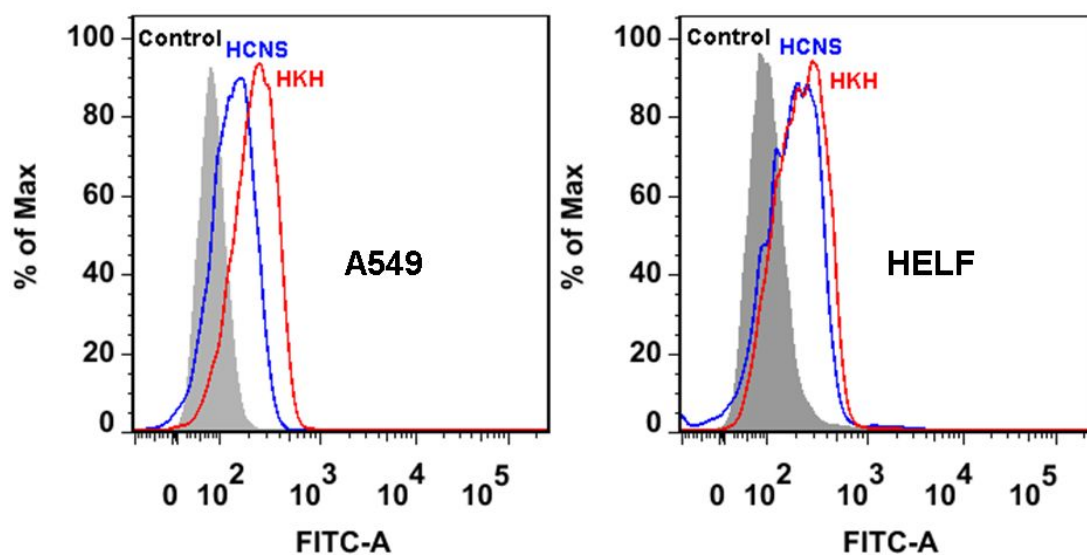

**Figure. S6.** Flow cytometric analysis of A549 and HELF cells incubated with HCNS and HKH for 4 hours.

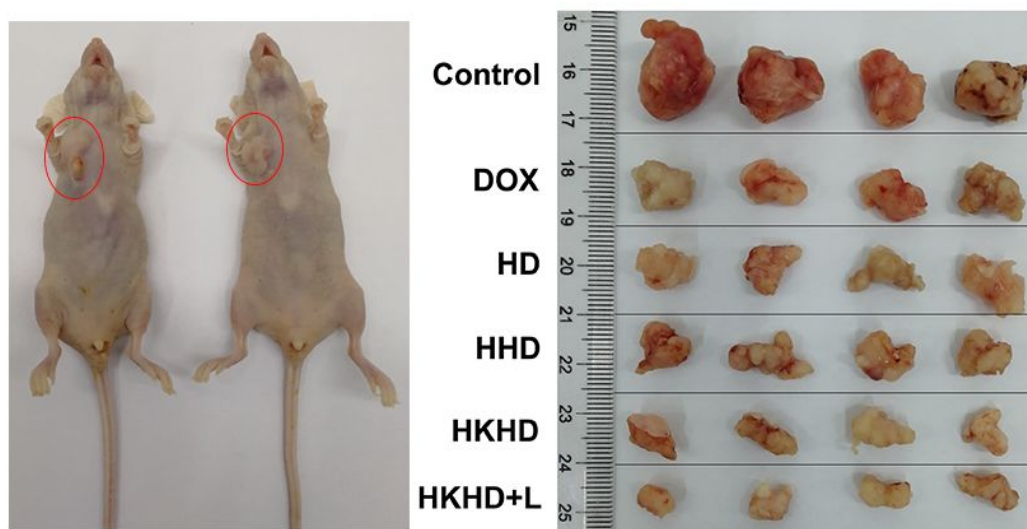

**Figure. S7.** The picture of the A549 tumor-bearing mice and tumors excised from euthanized A549 tumor-bearing mice.
